# Supplementary material for: Homeostasis Imbalance of YY2 and YY1 Promotes Tumor Growth by Manipulating Ferroptosis
Source: PubMed Central journal article supplement (PMC9069185; doi:10.1002/advs.202104836), 2022-03-04
Supplement: ADVS-9-2104836-s001.pdf [file ADVS-9-2104836-s001.pdf]

# Supplementary Materials for

## **Homeostasis imbalance of YY2 and YY1 promotes tumor growth by manipulating ferroptosis**

*Yanjun Li, Juan Li, Zhuolin Li, Mankun Wei, Hezhao Zhao, Makoto Miyagishi,  
Shourong Wu\*, Vivi Kasim\**

\*E-mail: vivikasim@cqu.edu.cn (V.K.)  
shourongwu@cqu.edu.cn (S.W.)

### **This PDF file includes:**

**Figure S1.** The efficacy and specificity of YY2 overexpression vector, shRNA expression vectors targeting YY2, and antibodies used.

**Figure S2.** YY2 suppresses tumor cells viability.

**Figure S3.** YY2 regulates tumor cells ferroptotic cell death.

**Figure S4.** YY2-silencing suppresses SLC7A11 and induces cellular cysteine and GSH levels.

**Figure S5.** SLC7A11 is crucial for YY2 suppression on cellular cysteine and GSH levels.

**Figure S6.** YY2 regulates SLC7A11/GSH synthesis axis in a p53-independent manner.

**Figure S7.** Mutation in zinc finger domains abolished YY2 regulatory effect on SLC7A11 expression.

**Figure S8.** YY2 and YY1 regulate SLC7A11 expression level.

**Figure S9.** YY2 regulates SLC7A11/GSH synthesis axis in YY1-knocked down cells.

**Figure S10.** YY1 regulates ferroptosis in HCT116<sup>YY2null</sup> cells.

**Figure S11.** Uncropped western blots with the indicated areas of selection in Figures 1, 3 to 6 and 8, Figures S1, S2, and S4 to S9.

**Table S1.** Primer pairs used for gene quantification by quantitative RT-PCR.

**Table S2.** Antibodies used for western blotting, immunohistochemical staining and ChIP assay.

**Figure S1.**

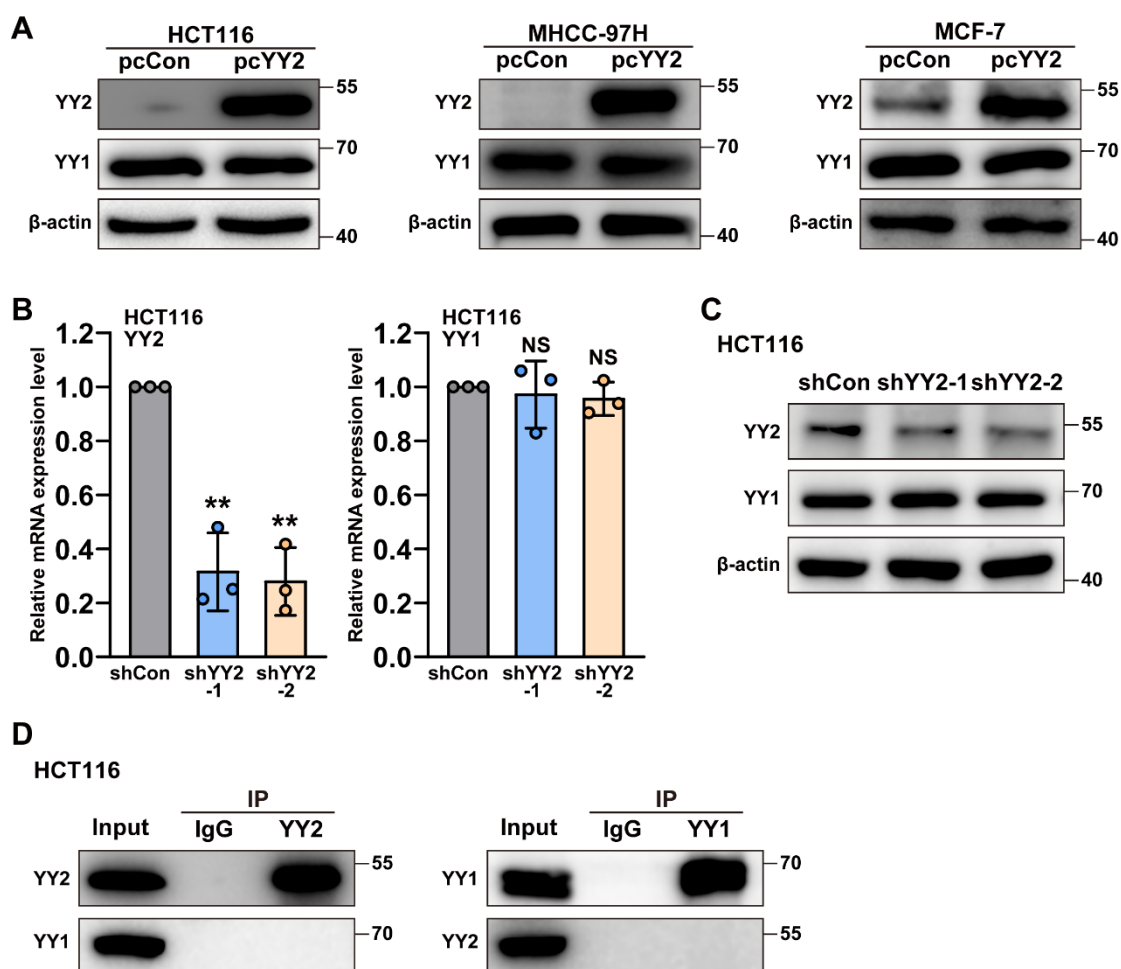

**Supplementary Fig. S1. The efficacy and specificity of YY2 overexpression vector, shRNA expression vectors targeting YY2, and antibodies used.** (A) YY2 protein expression level in HCT116, MHCC-97H, and MCF-7 cells transfected with YY2 overexpression vector, as determined using western blotting. (B and C) YY2 and YY1 mRNA (B) and protein (C) expression levels in HCT116 cells transfected with shRNAs targeting YY2, as determined using quantitative reverse-transcription PCR (qRT-PCR) and western blotting, respectively. (D) Specificity of the YY2 and YY1 antibodies used in this work, as determined using immunoprecipitation assay. Cells transfected with shCon or pcCon were used as controls.  $\beta$ -actin was used for qRT-PCR normalization and as western blotting loading control. Quantification data are shown as mean  $\pm$  SD (n = 3). P values were calculated using two-tailed unpaired Student's t-test. pcCon: pcDNA3.1(+); \*\* $P < 0.01$ .

**Figure S2.**

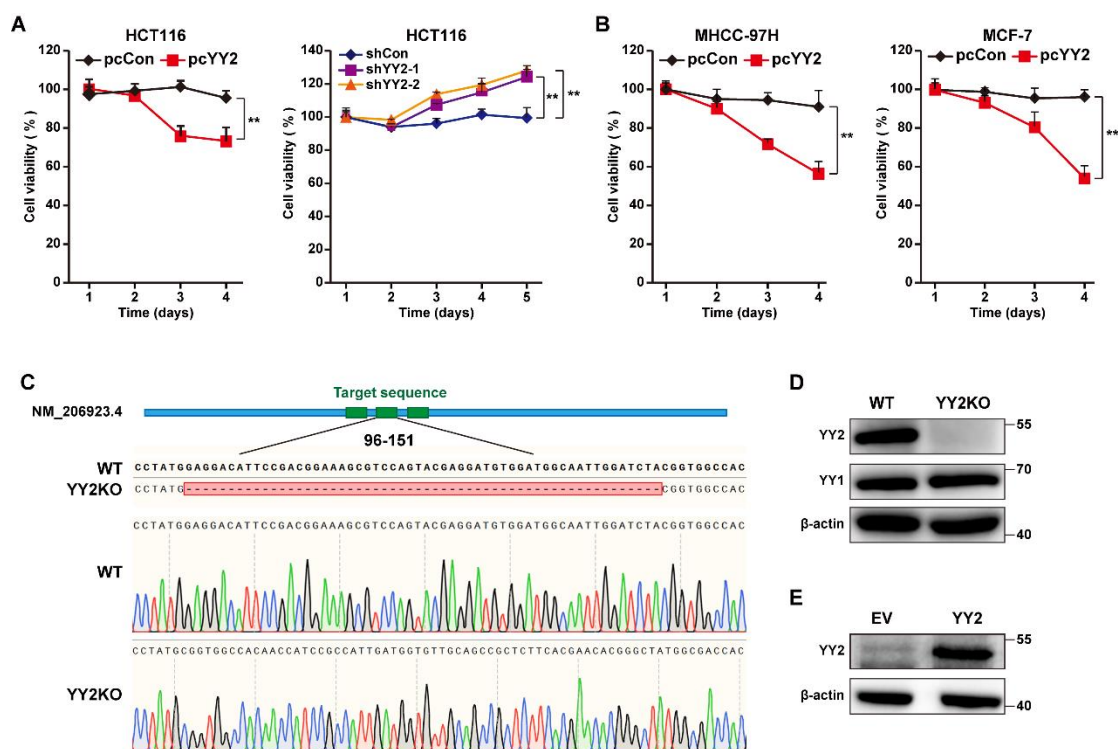

**Supplementary Fig. S2. YY2 suppresses tumor cells viability.** (A) Viabilities of YY2-overexpressed (left panel) and YY2-knocked down (right panel) HCT116 cells were measured at indicated time points. (B) Viabilities of MHCC-97H and MCF-7 cells overexpressing YY2 were measured at indicated time points. (C) Establishment of YY2-knocked out HCT116 (HCT116<sup>YY2null</sup>) cells. Sequencing results depicting the deleted region in HCT116<sup>YY2null</sup> cells were shown. (D) YY2 and YY1 protein expression levels in HCT116<sup>YY2null</sup> cells, as determined using western blotting. (E) YY2 protein expression level in HCT116 cells stably overexpressing YY2 established using lentivirus, as determined using western blotting. Wild-type HCT116 cells, HCT116 cells transfected with shCon or pcCon, or infected with empty lentivirus (EV) were used as controls. β-actin was used for western blotting loading control. Quantification data are shown as mean ± SD (n = 3). P values were calculated using two-tailed unpaired Student's t-test. pcCon: pcDNA3.1(+); YY2KO: HCT116<sup>YY2null</sup> cells; \*\*P < 0.01.

**Figure S3.**

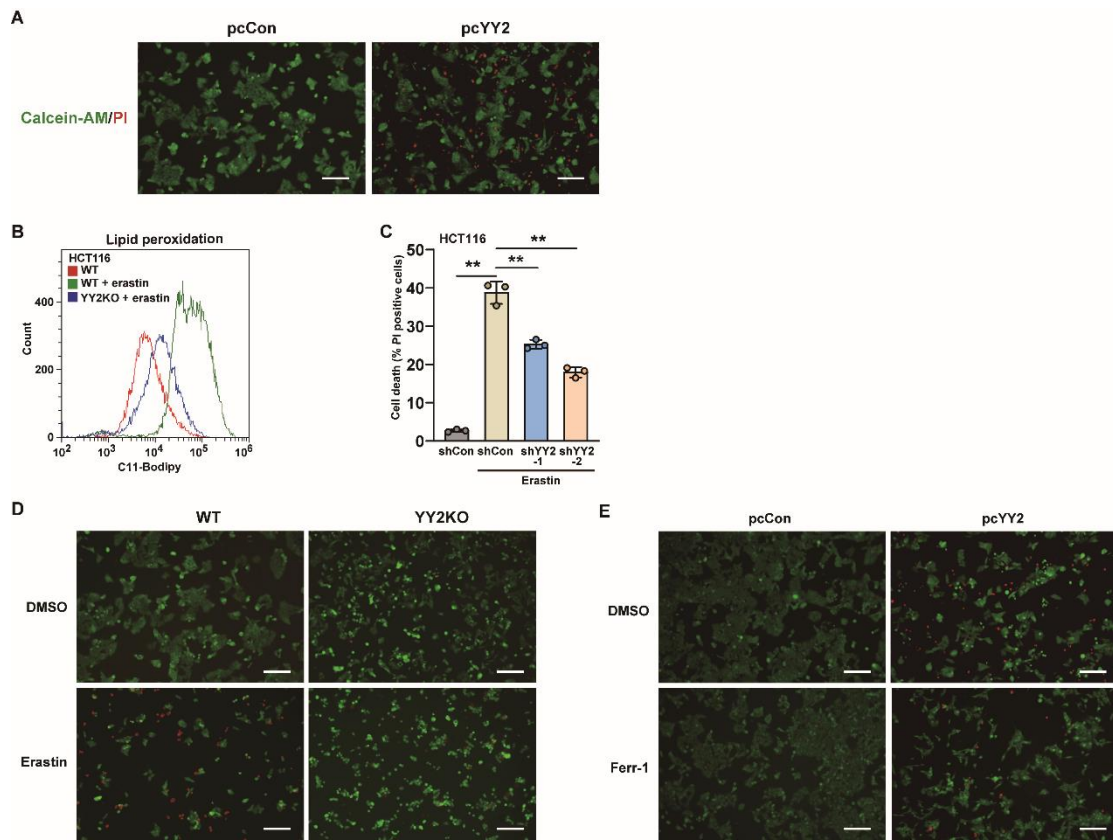

**Supplementary Fig. S3. YY2 regulates tumor cells ferroptotic cell death.** (A) Staining of living cells (calcein-AM, green) and dead cells (PI, red) in HCT116 cells overexpressing YY2. Scale bars, 100  $\mu$ m. (B) Lipid peroxidation level in HCT116<sup>YY2null</sup> cells treated with 20  $\mu$ M erastin for 24 h, as assessed by C11-BODIPY staining and flow cytometry. (C) Cell death percentage of YY2-knocked down HCT116 cells treated with 20  $\mu$ M erastin for 24 h, as determined using PI staining and flow cytometry. (D) Staining of living and dead cells in HCT116<sup>YY2null</sup> cells treated with 20  $\mu$ M erastin for 24 h using calcein-AM/PI. Scale bars, 100  $\mu$ m. (E) Staining of living and dead cells in HCT116 cells overexpressing YY2 and treated with 30  $\mu$ M ferrostatin-1 for 24 h using calcein-AMP/PI. Scale bars, 100  $\mu$ m. Wild-type HCT116 cells or HCT116 cells transfected with shCon or pcCon were used as controls. Quantification data are shown as mean  $\pm$  SD (n = 3). *P* values were calculated using two-tailed unpaired Student's t-test. One-way ANOVA analyses were performed when more than two groups were compared. pcCon: pcDNA3.1(+); YY2KO: HCT116<sup>YY2null</sup> cells; Ferr-1: ferrostatin 1; \*\**P* < 0.01.

**Figure S4.**

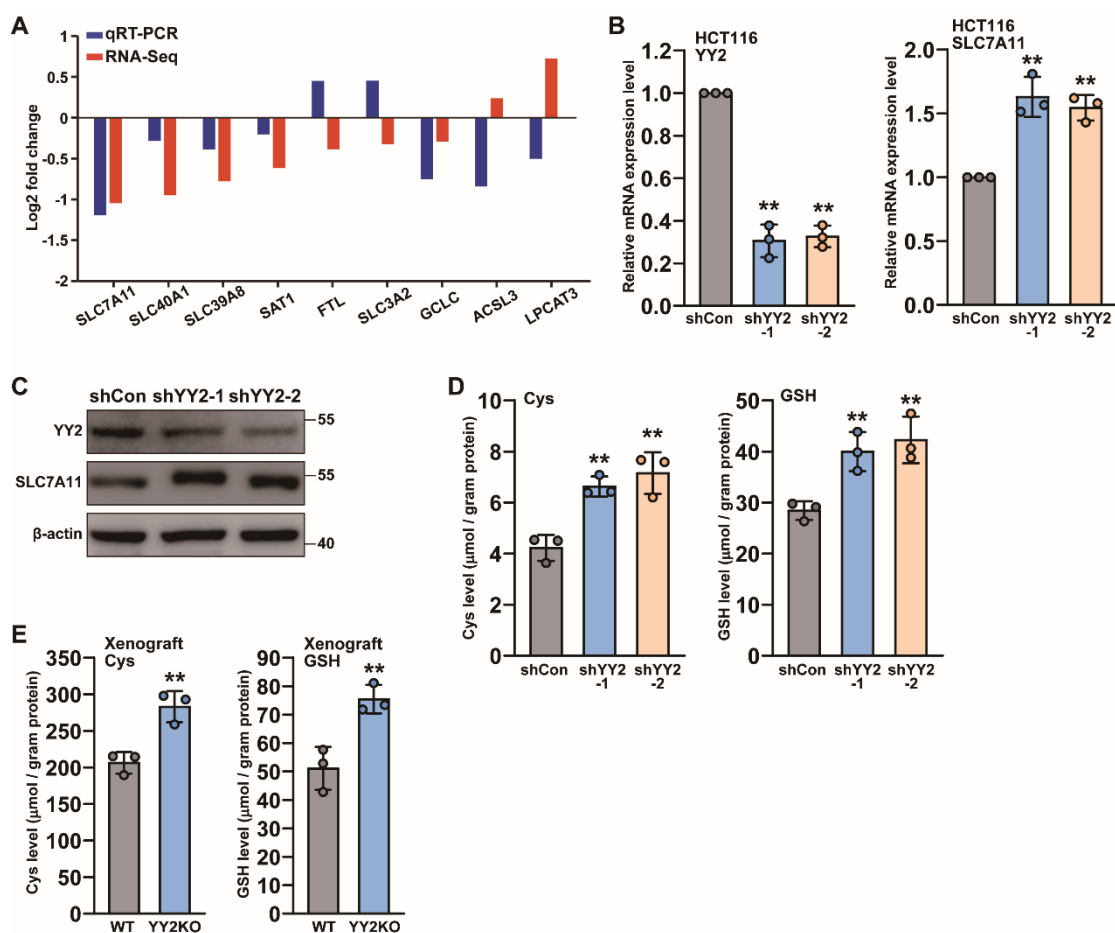

**Supplementary Fig. S4. YY2-silencing suppresses SLC7A11 and induces cellular cysteine and GSH levels.** (A) Fold-change of mRNA expression levels of candidate target genes related to ferroptosis in HCT116 overexpressing YY2 compared to HCT116 cells transfected with pcCon, as determined using qRT-PCR. (B and C) YY2 and SLC7A11 mRNA (B) and protein (C) expression levels in YY2-knocked down HCT116 cells, as determined using qRT-PCR and western blotting, respectively. (D) Cysteine (left) and GSH (right) levels in YY2-knocked down HCT116 cells. (E) Cysteine (left) and GSH (right) levels in xenografted tumors formed by wild-type HCT116 and HCT116<sup>YY2null</sup> cells. Wild-type HCT116 cells or HCT116 cells transfected with shCon or pcCon were used as controls.  $\beta$ -actin was used for qRT-PCR normalization and as western blotting loading control. Quantification data are shown as mean  $\pm$  SD (n = 3). P values were calculated using two-tailed unpaired Student's t-test. pcCon: pcDNA3.1(+); YY2KO: HCT116<sup>YY2null</sup> cells; \*\*P < 0.01.

**Figure S5.**

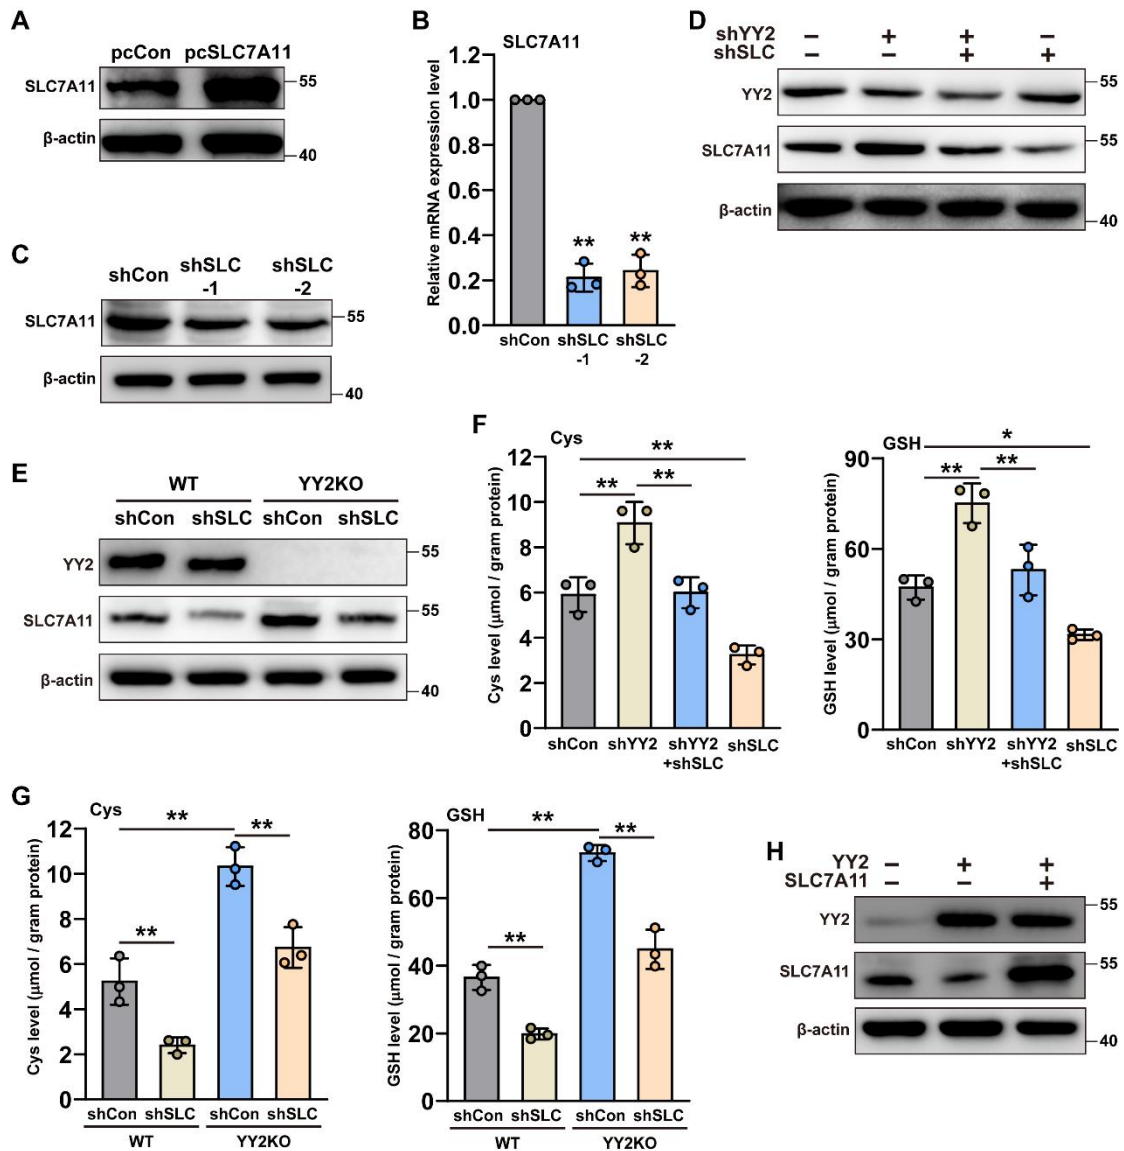

**Supplementary Fig. S5. SLC7A11 is crucial for YY2 suppression on cellular cysteine and GSH levels.** (A) SLC7A11 protein expression level in HCT116 cells transfected with *SLC7A11* overexpression vector, as determined using western blotting. (B and C) SLC7A11 mRNA (B) and protein (C) expression levels in HCT116 cells transfected with shRNAs targeting *SLC7A11*, as determined using qRT-PCR and western blotting, respectively. (D and E) YY2 and SLC7A11 protein expression levels in YY2/*SLC7A11*-double knocked down (D) HCT116 and *SLC7A11*-knocked down HCT116<sup>YY2null</sup> cells, as examined using western blotting. (F and G) Cysteine (left) and GSH (right) levels in YY2/*SLC7A11*-double knocked down HCT116 (F) and *SLC7A11*-knocked down HCT116<sup>YY2null</sup> cells (G). (H) YY2 and

SLC7A11 protein expression levels in HCT116 cells infected with Lenti-YY2 (YY2) and Lenti-SLC7A11 (SLC7A11), as determined using western blotting. Wild-type HCT116 cells, HCT116 cells transfected with shCon or pcCon, or infected with empty lentivirus were used as controls.  $\beta$ -actin was used for qRT-PCR normalization and as western blotting loading control. Quantification data are shown as mean  $\pm$ SD (n = 3). *P* values were calculated using two-tailed unpaired Student's *t*-test. One-way ANOVA analyses were performed when more than two groups were compared. pcCon: pcDNA3.1(+); YY2KO: HCT116<sup>p53null</sup> cells; \**P* < 0.05; \*\**P* < 0.01.

**Figure S6.**

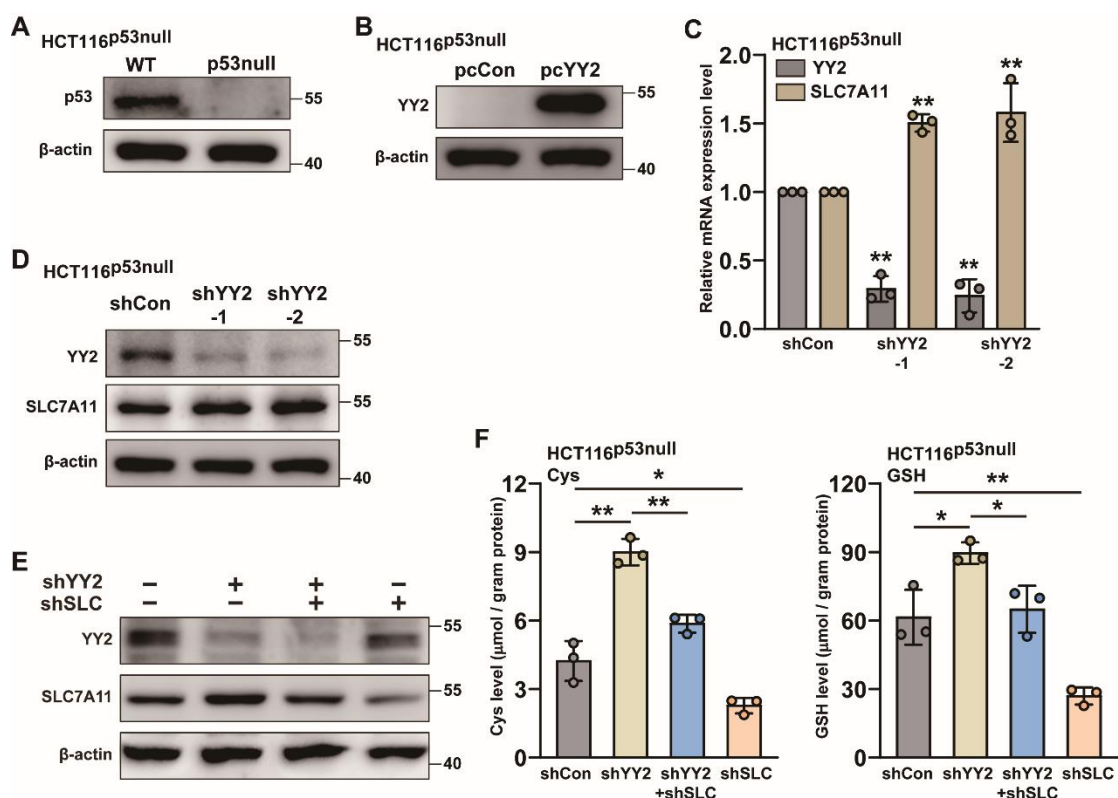

**Supplementary Fig. S6. YY2 regulates SLC7A11/GSH synthesis axis in a p53-independent manner.** (A) p53 protein expression level in HCT116<sup>p53null</sup> cells, as determined using western blotting. (B) YY2 protein expression level in HCT116<sup>p53null</sup> cells transfected with YY2 overexpression vector, as determined using western blotting. (C and D) YY2 and SLC7A11 mRNA (C) and protein (D) expression levels in YY2-knocked down HCT116<sup>p53null</sup> cells, as determined using qRT-PCR and western blotting, respectively. (E) YY2 and SLC7A11 protein expression levels in YY2/SLC7A11-double knocked down HCT116<sup>p53null</sup> cells, as examined using western blotting. (F) Cysteine (left) and GSH (right) levels in YY2/SLC7A11-double knocked down HCT116<sup>p53null</sup> cells. Cells transfected with shCon or pcCon were used as controls. β-actin was used for qRT-PCR normalization and as western blotting loading control. Quantification data are shown as mean ± SD (n = 3). P values were calculated using two-tailed unpaired Student's t-test. One-way ANOVA analyses were performed when more than two groups were compared. pcCon: pcDNA3.1(+); \*P < 0.05; \*\*P < 0.01.



**Figure S7.**

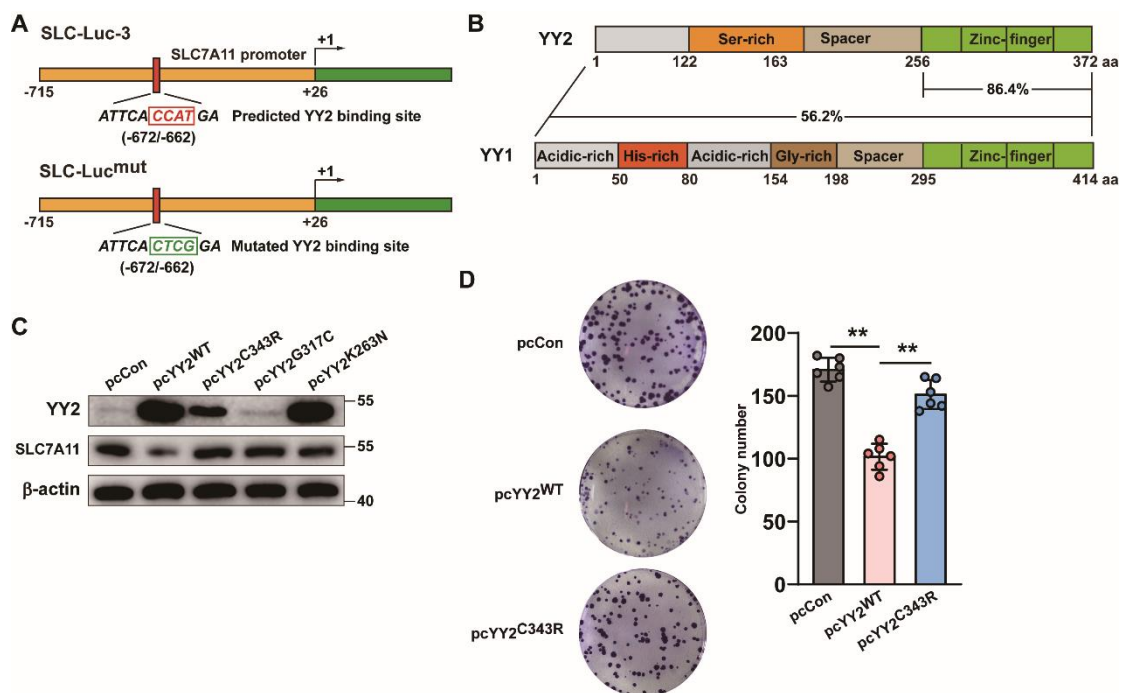

**Supplementary Fig. S7. Mutation in zinc finger domains abolished YY2 regulatory effect on SLC7A11 expression.** (A) Schematic diagram of reporter vector bringing the -715 to +26 region of *SLC7A11*-promoter (SLC-Luc-3; upper panel) and reporter vector bringing the -715 to +26 region of *SLC7A11*-promoter with mutated YY2 predicted binding site (SLC-Luc<sup>mut</sup>; lower panel). The mutated nucleotides are shown in red. (B) Schematic diagram showing the comparison between the protein structures of YY2 and YY1. Percentages of identity between the whole proteins and the zinc-fingers domains are shown. (C) SLC7A11 protein expression level in HCT116 cells overexpressing cancer-associated YY2 mutants and wild-type YY2 (WT), as determined using western blotting. (D) Colony formation potential of HCT116 cells overexpressing YY2<sup>C343R</sup> mutant. Representative images and quantification results (n = 6) are shown. Cells transfected with pcCon or wild-type YY2 overexpression vector were used as controls.  $\beta$ -actin was used for western blotting loading control. Quantification data are shown as mean  $\pm$  SD. *P* values were calculated using one-way ANOVA analyses. pcCon: pcDNA3.1(+); \*\**P* < 0.01.

**Figure S8.**

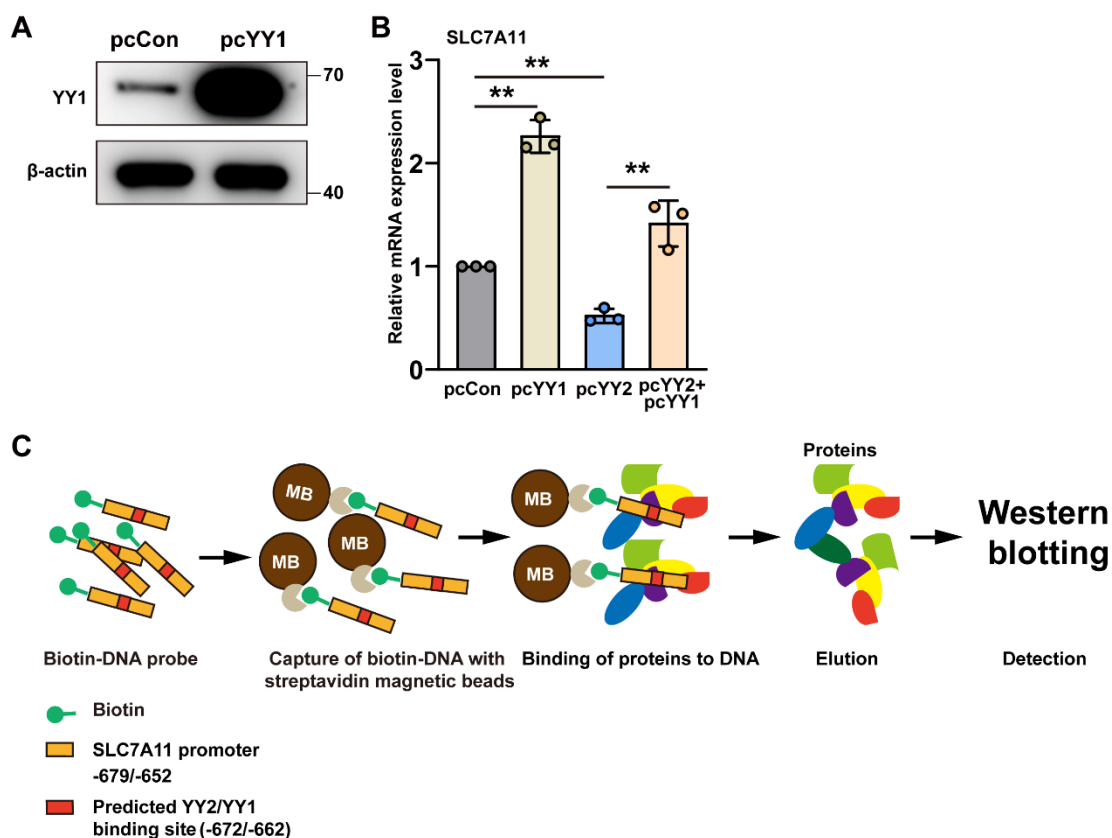

**Supplementary Fig. S8. YY2 and YY1 regulate SLC7A11 expression level. (A)** YY1 protein level in HCT116 cells transfected with pcYY1, as determined by western blotting. **(B)** SLC7A11 mRNA expression in HCT116 cells overexpressing YY2 and/or YY1, as determined using qRT-PCR.  $\beta$ -actin was used for qRT-PCR normalization control and as western blotting loading control. **(C)** Schematic diagram of DNA affinity precipitation assay using biotin-DNA probe targeting the -672 to -662 region of the *SLC7A11* promoter. Quantification data are shown as mean  $\pm$ SD (n = 3). *P* values were calculated using one-way ANOVA analyses. pcCon: pcDNA3.1(+); \*\**P* < 0.01.

**Figure S9.**

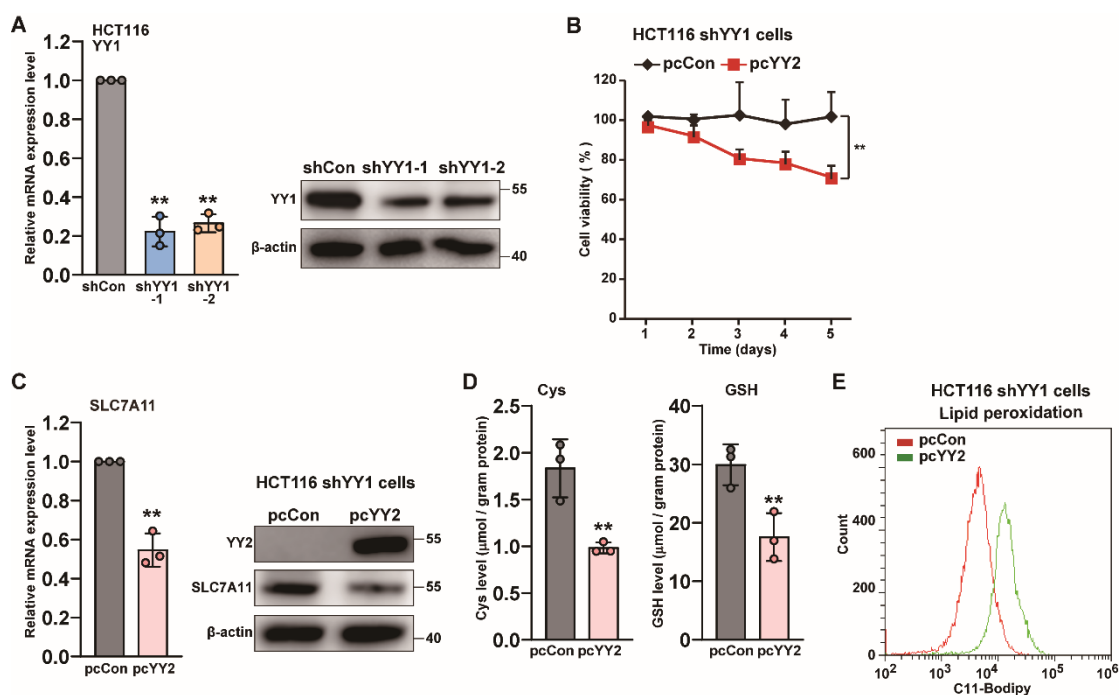

**Supplementary Fig. S9. YY2 regulates SLC7A11/GSH synthesis axis in YY1-knocked down cells.** (A) YY1 mRNA (left panel) and protein (right panel) expression levels in YY1-knocked down HCT116 stable cell lines, as determined using qRT-PCR and western blotting, respectively. (B) Viabilities of YY1-knocked down HCT116 cells overexpressing YY2 were measured at indicated time points. (C) SLC7A11 mRNA (left) and protein (right) expression levels in YY1-knocked down HCT116 cells overexpressing YY2, as determined using qRT-PCR and western blotting, respectively. (D) Cysteine (left) and GSH (right) levels in YY1-knocked down HCT116 cells overexpressing YY2. (E) Lipid peroxidation in YY1-knocked down HCT116 cells overexpressing YY2, as assessed by C11-BODIPY staining and flow cytometry. Cells transfected with shCon or pcCon were used as controls.  $\beta$ -actin was used for qRT-PCR normalization and as western blotting loading control. Quantification data are shown as mean  $\pm$ SD (n = 3). P values were calculated using two-tailed unpaired Student's t-test. pcCon: pcDNA3.1(+); \*\* $P < 0.01$ .

**Figure S10.**

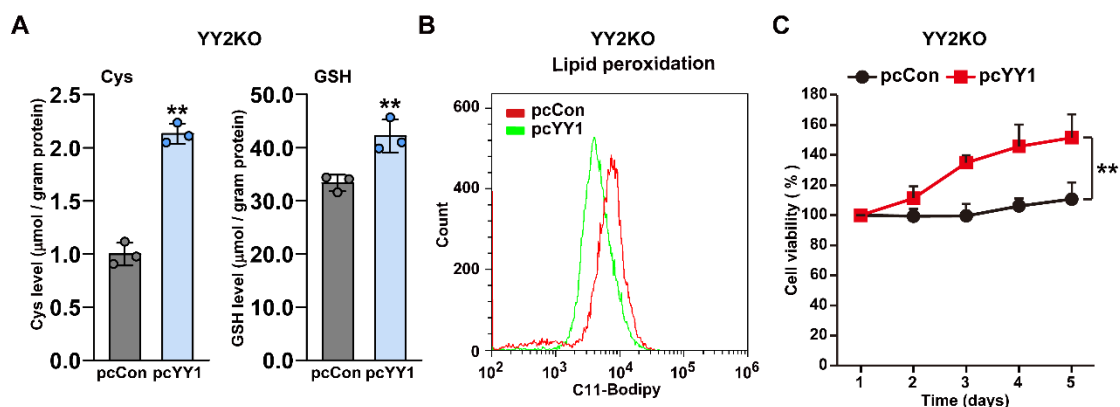

**Supplementary Fig. S10. YY1 regulates ferroptosis in HCT116<sup>YY2null</sup> cells.** (A) Cysteine (left) and GSH (right) levels in HCT116<sup>YY2null</sup> cells overexpressing *YY1*. (B) Lipid peroxidation in HCT116<sup>YY2null</sup> cells overexpressing *YY1*, as assessed by C11-BODIPY staining and flow cytometry. (C) Viabilities of HCT116<sup>YY2null</sup> cells overexpressing *YY1* were measured at indicated time points. Cells transfected with pcCon were used as controls. Quantification data are shown as mean  $\pm$  SD (n = 3). *P* values were calculated using two-tailed unpaired Student's t-test. pcCon: pcDNA3.1(+); YY2KO: HCT116<sup>YY2null</sup> cells; \*\**P* < 0.01.

**Figure S11.**

**A**

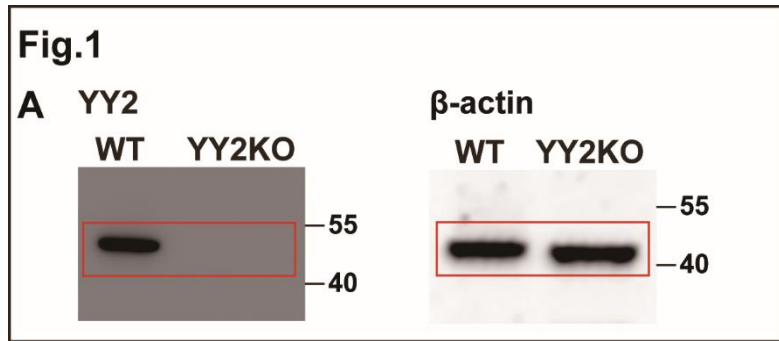

**B**

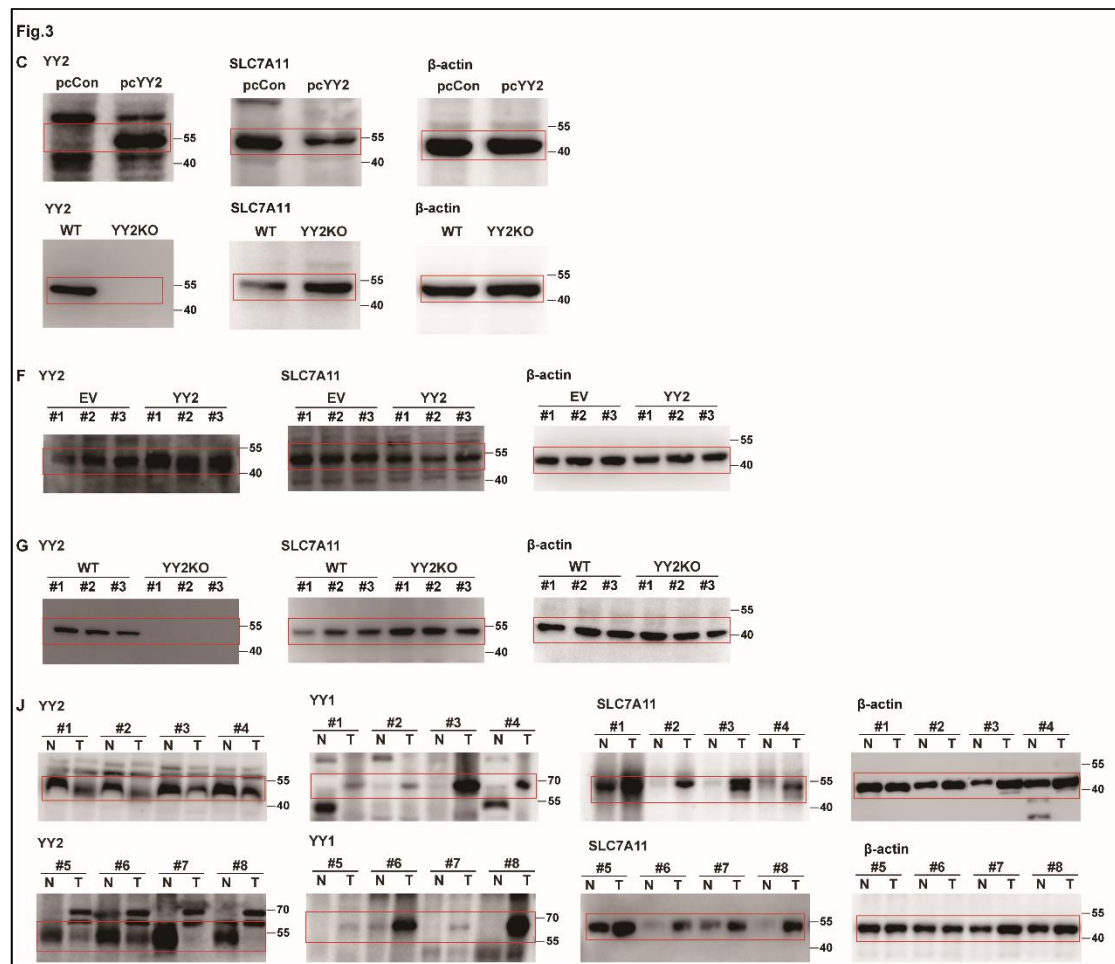

**Supplementary Fig. S11. Uncropped western blots with the indicated areas of selection in Figures 1, 3 to 6 and 8, Figures S1, S2, and S4 to S9. (continued)**

C

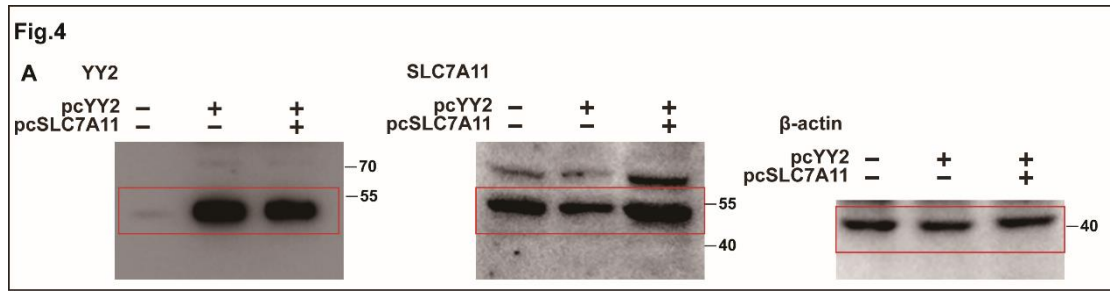

D

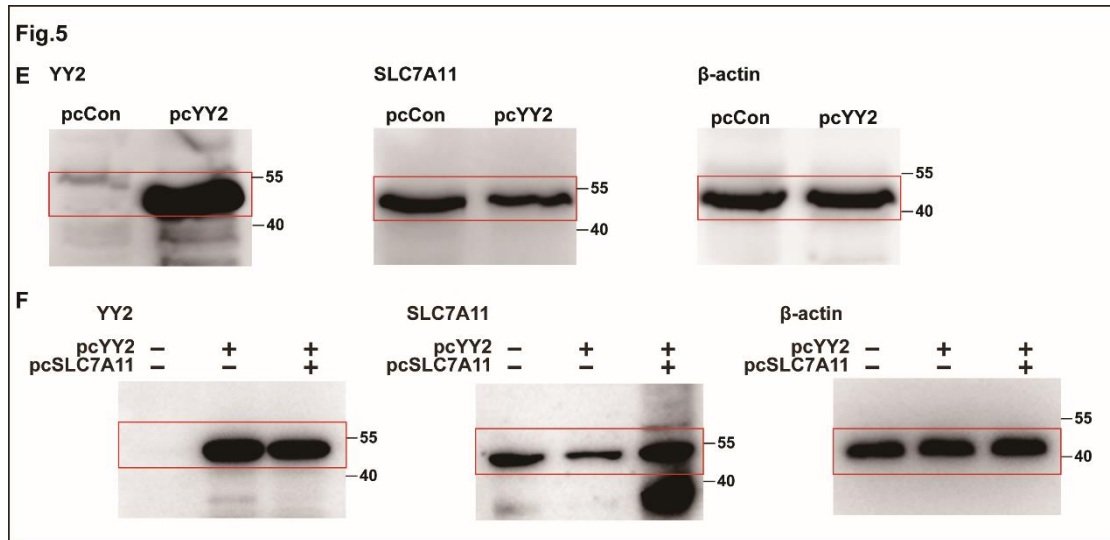

E

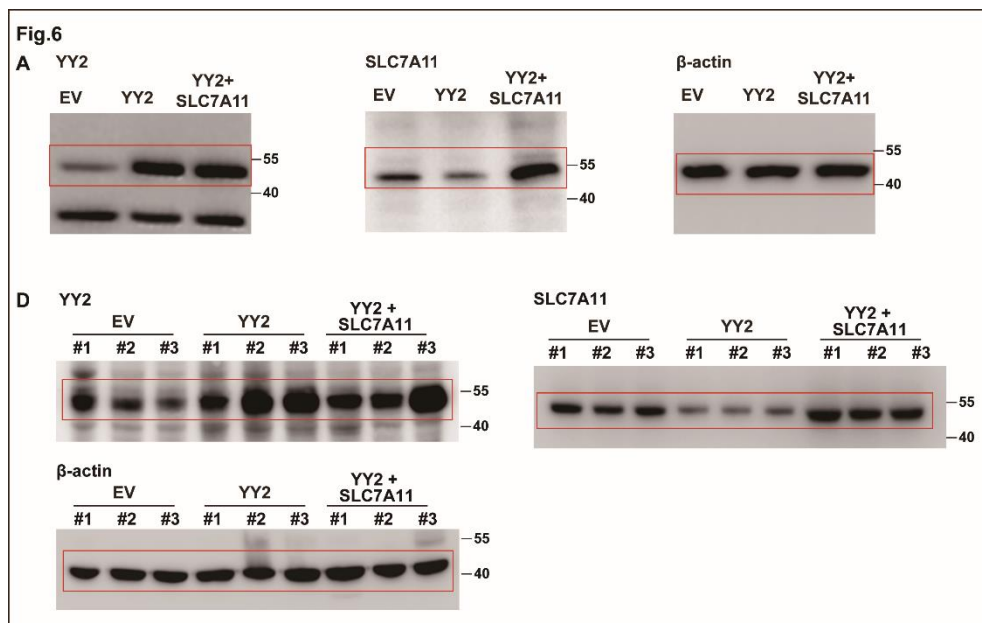

Supplementary Fig. S11. Uncropped western blots with the indicated areas of selection in Figures 1, 3 to 6 and 8, Figures S1, S2, and S4 to S9. (continued)

**F**

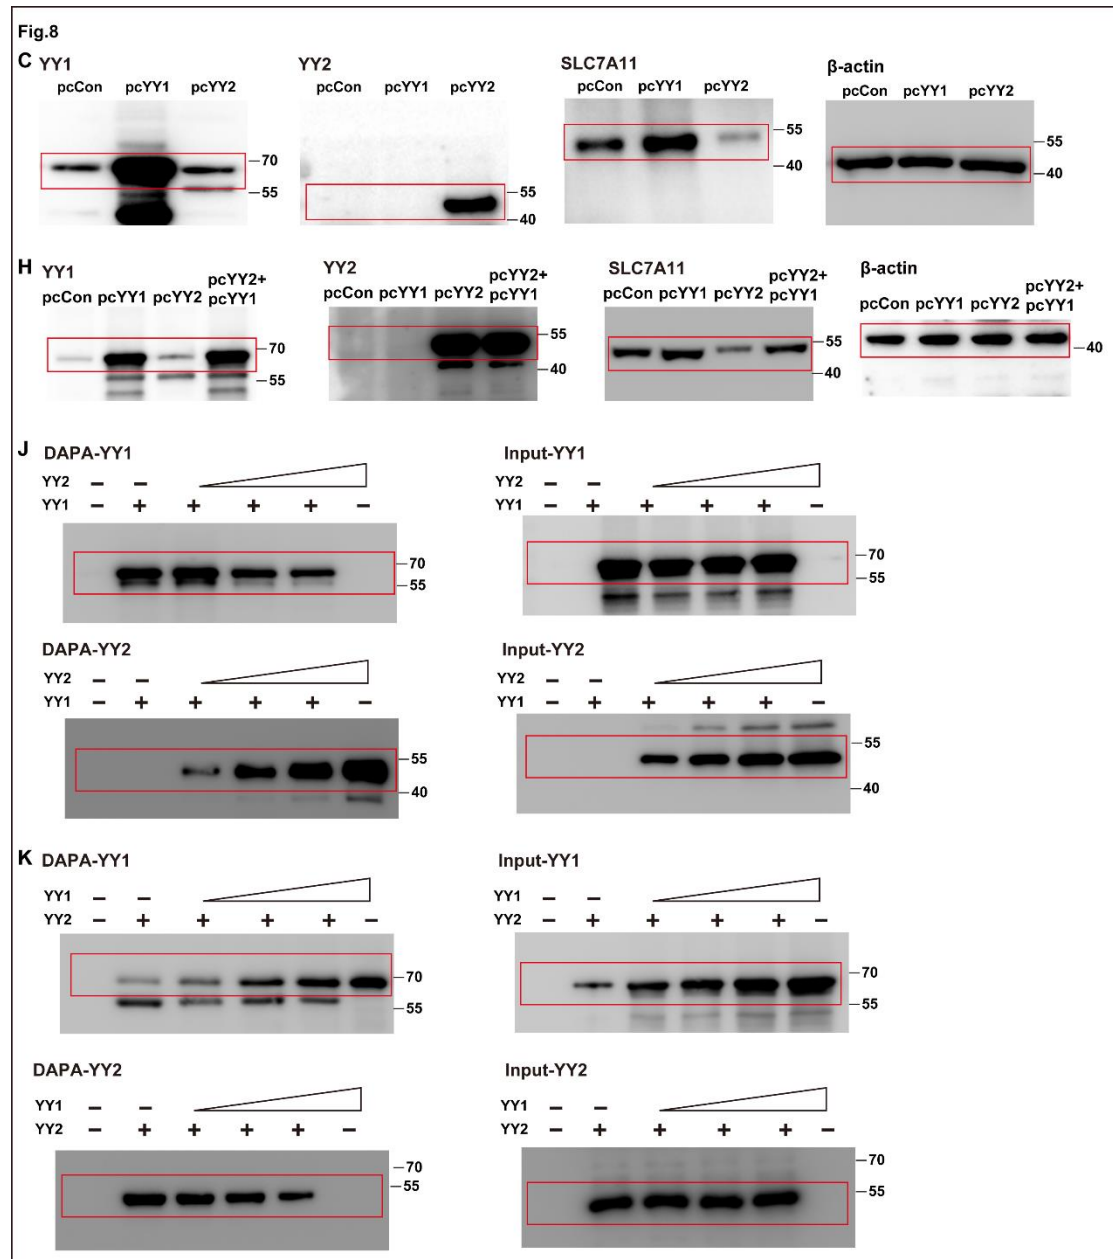

**Supplementary Fig. S11. Uncropped western blots with the indicated areas of selection in Figures 1, 3 to 6 and 8, Figures S1, S2, and S4 to S9. (continued)**

G

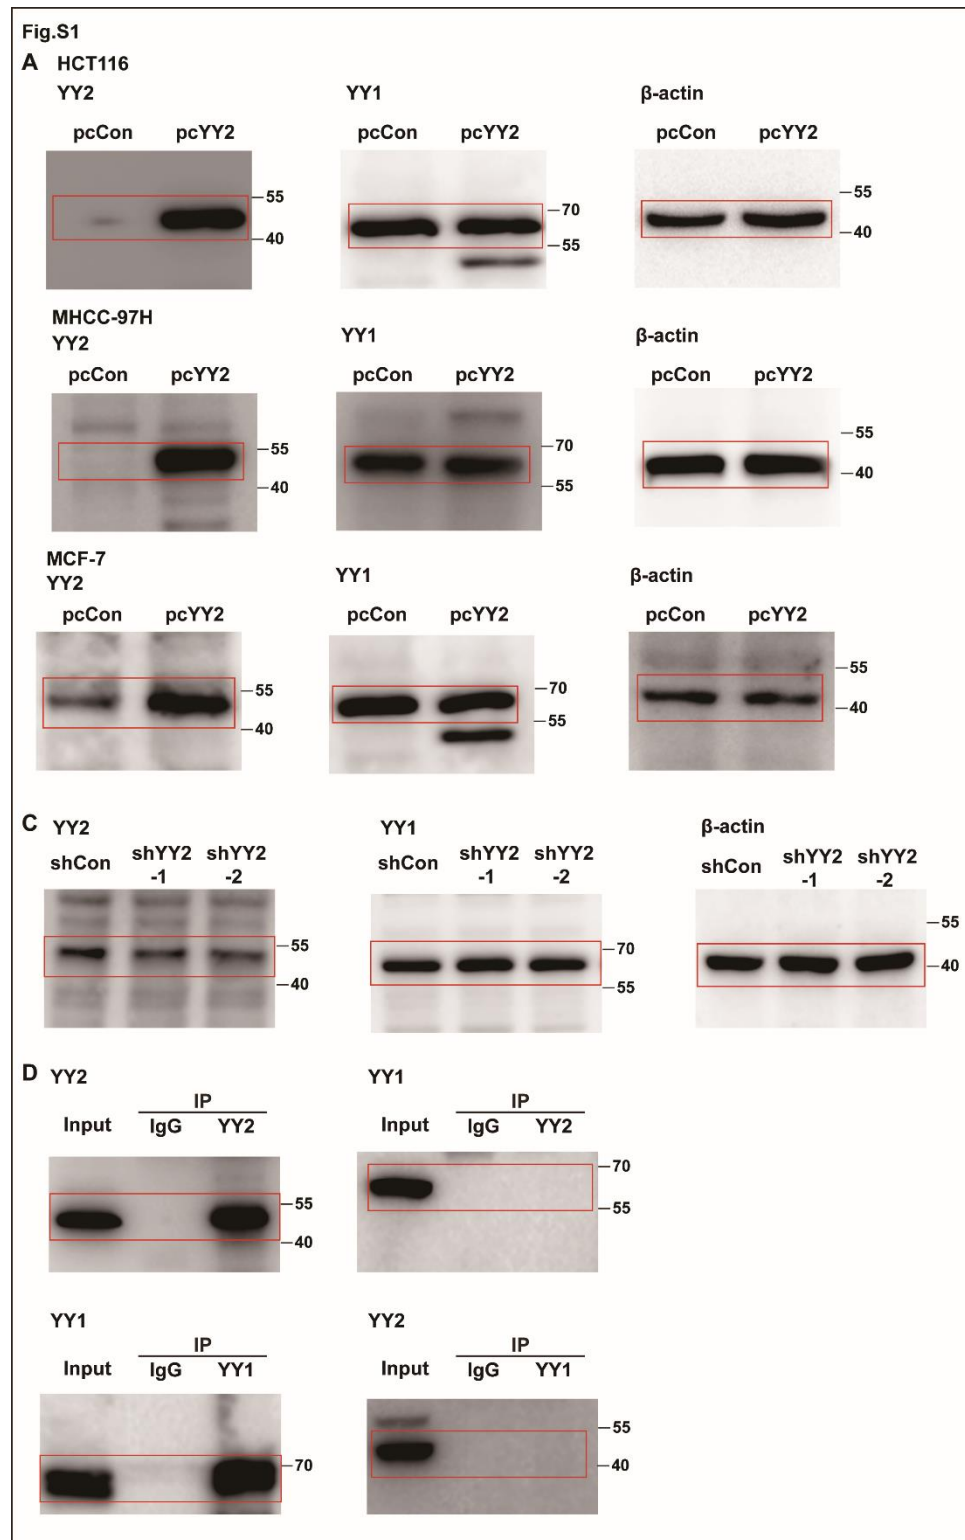

**Supplementary Fig. S11. Uncropped western blots with the indicated areas of selection in Figures 1, 3 to 6 and 8, Figures S1, S2, and S4 to S9. (continued)**



## H

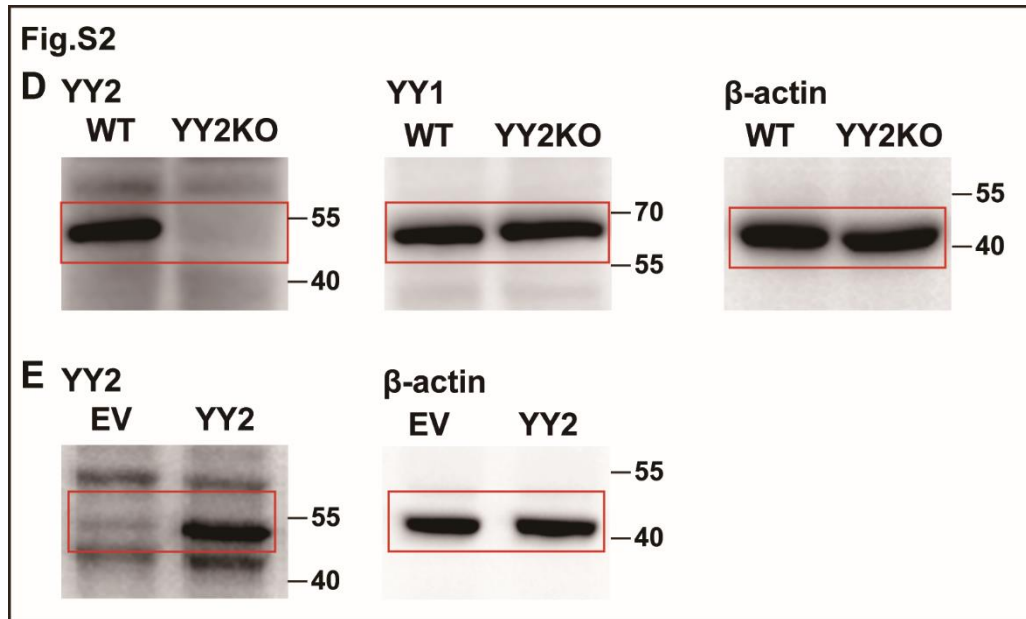

## I

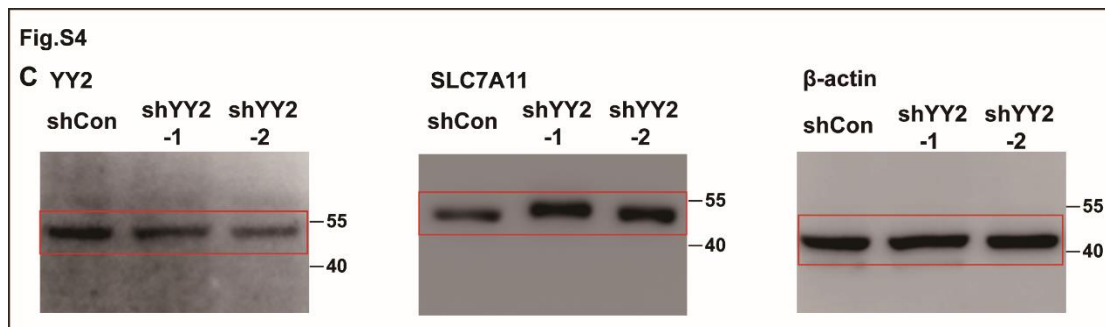

Supplementary Fig. S11. Uncropped western blots with the indicated areas of selection in Figures 1, 3 to 6 and 8, Figures S1, S2, and S4 to S9. (continued)

**J**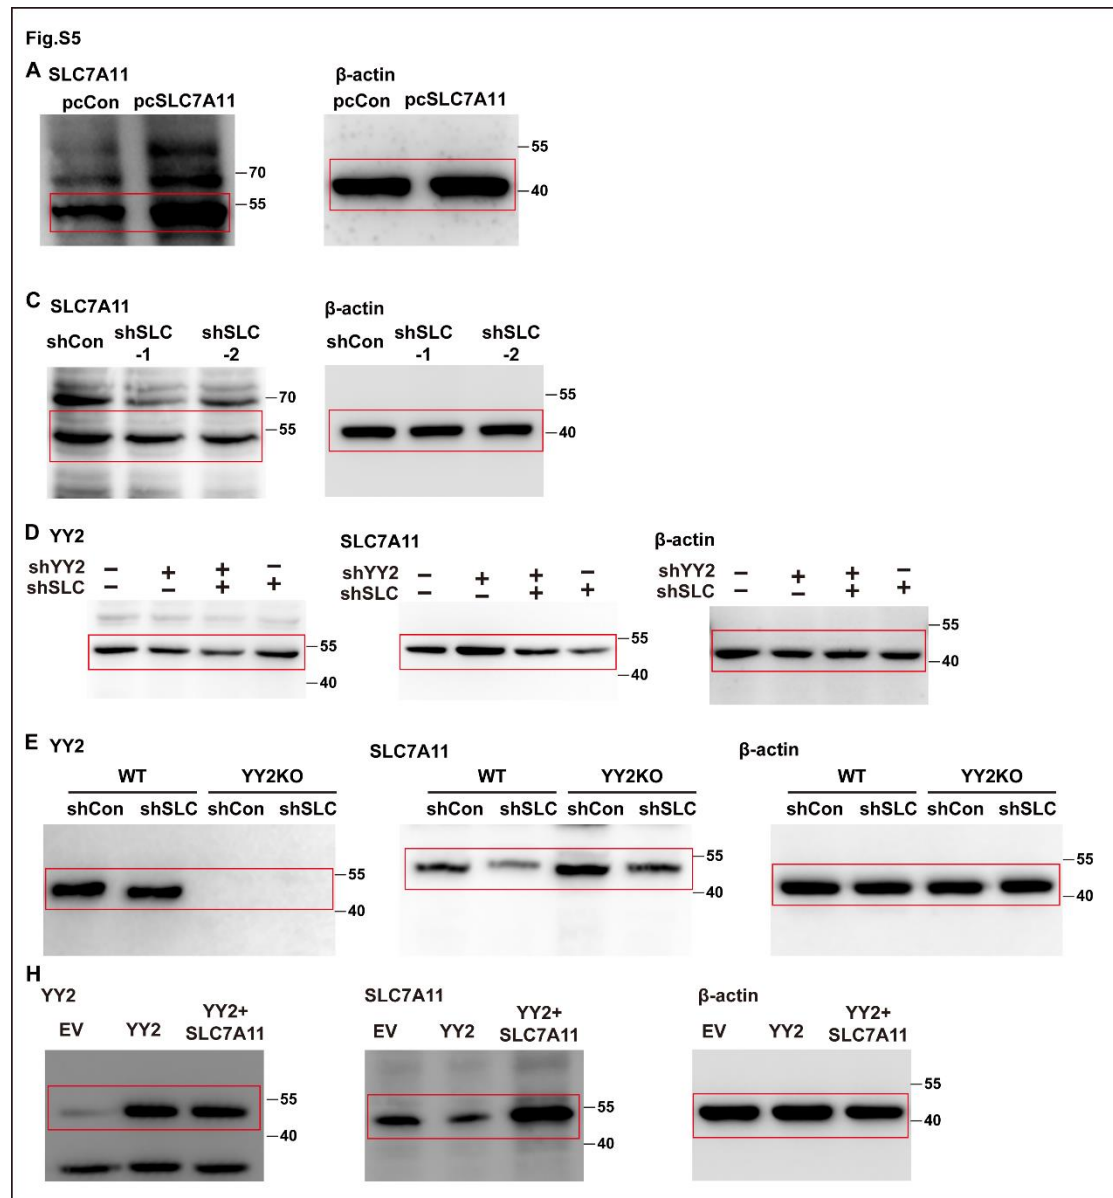

**Supplementary Fig. S11. Uncropped western blots with the indicated areas of selection in Figures 1, 3 to 6 and 8, Figures S1, S2, and S4 to S9. (continued)**

# K

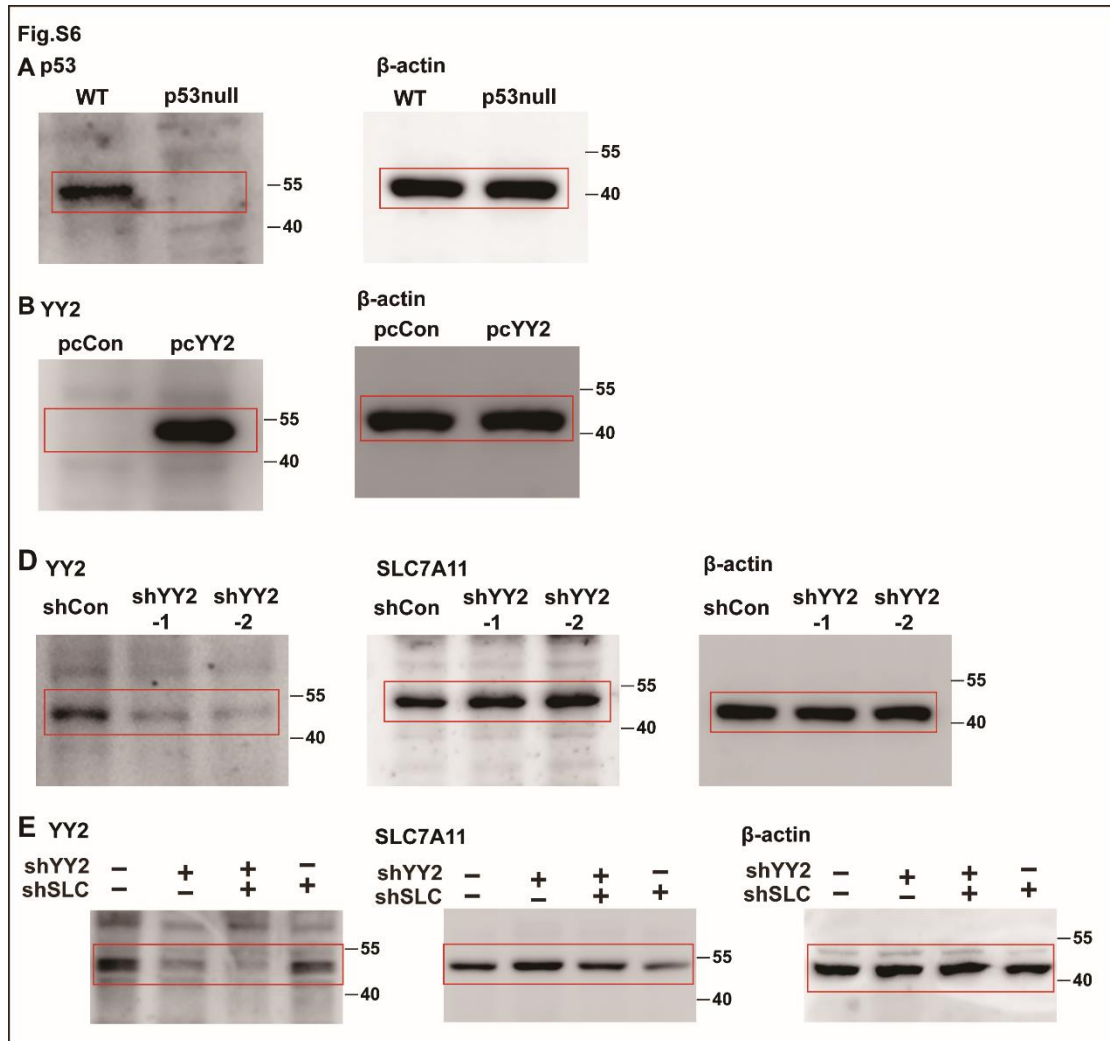

**Supplementary Fig. S11. Uncropped western blots with the indicated areas of selection in Figures 1, 3 to 6 and 8, Figures S1, S2, and S4 to S9. (continued)**

L

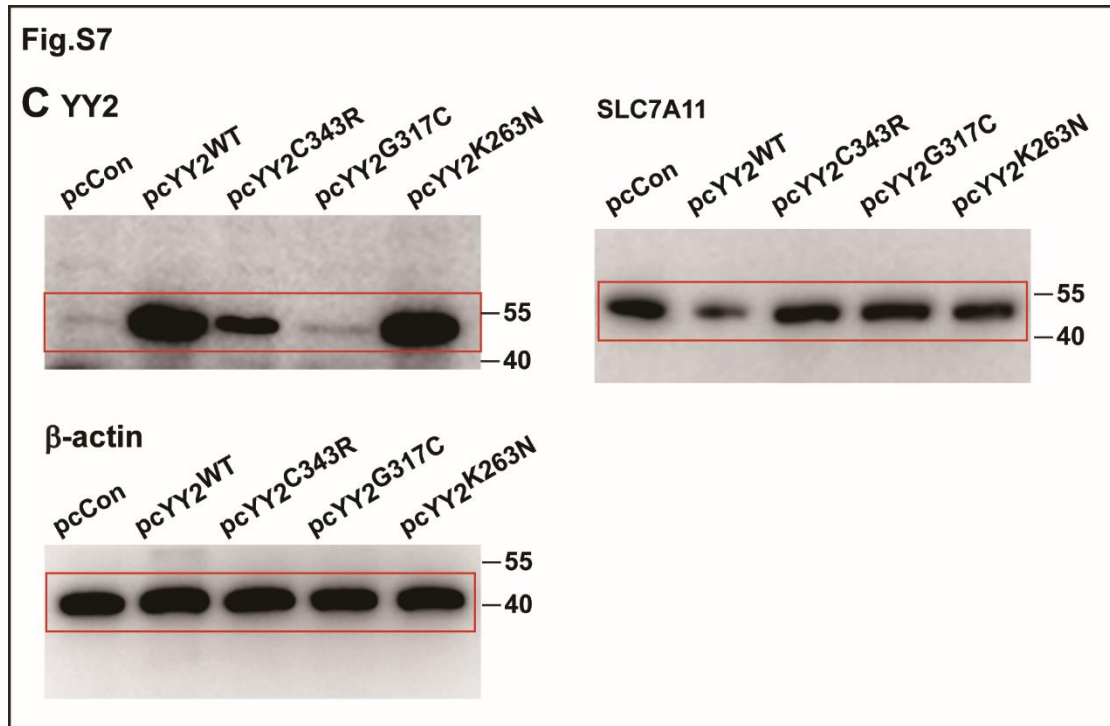

M

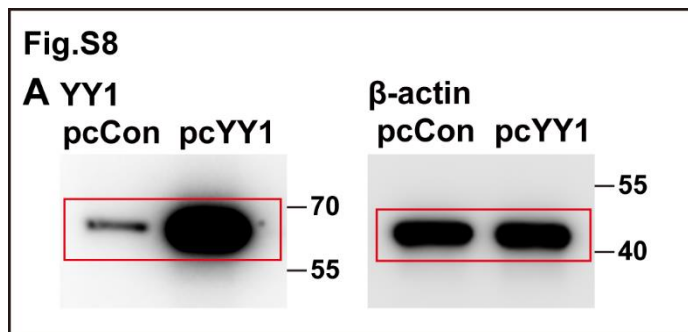

Supplementary Fig. S11. Uncropped western blots with the indicated areas of selection in Figures 1, 3 to 6 and 8, Figures S1, S2, and S4 to S9. (continued)

N

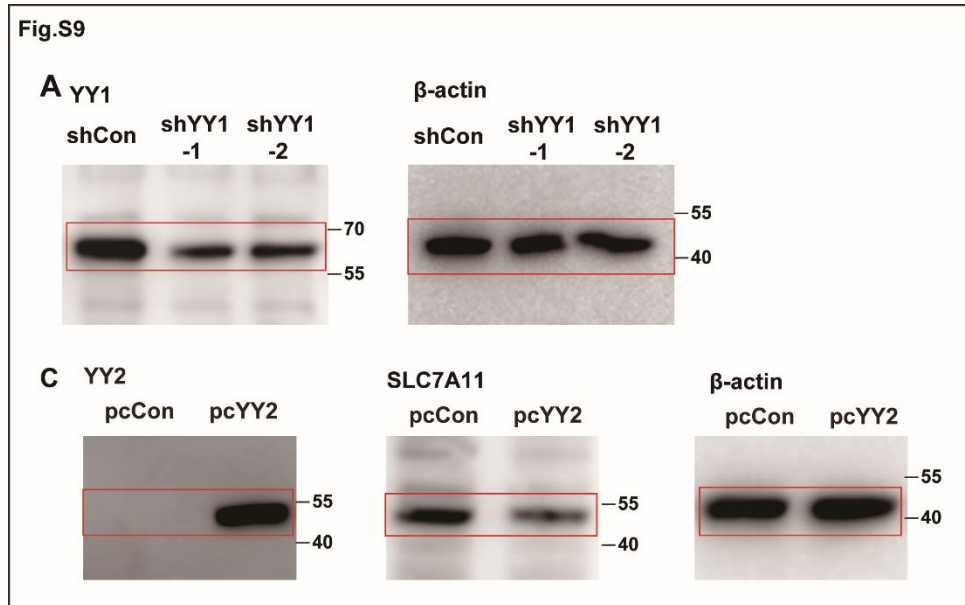

**Supplementary Fig. S11. Uncropped western blots with the indicated areas of selection in Figures 1, 3 to 6 and 8, Figures S1, S2, and S4 to S9. (continued)**

**Table S1. Primer pairs used for gene quantification by quantitative RT-PCR.**

| <b>Genes</b>   | <b>Refseq No.</b> | <b>Forward primer sequence (5'-3')</b> | <b>Reverse primer sequence (5'-3')</b> |
|----------------|-------------------|----------------------------------------|----------------------------------------|
| YY2            | NM_206923.4       | GAAGTGGTGGGCTATTGCGA                   | AGGGTCATCTGGAAGTGCTC                   |
| YY1            | NM_003403.4       | GCGGAGCCCTCAGCCATGGCCTCG               | CAGCGGCTGCAGAGCGATCATGG                |
| SLC7A11        | NM_014331.4       | TCCTGCTTTGGCTCCATGAACG                 | AGAGGAGTGTGCTTGCGGACAT                 |
| SLC40A1        | NM_014585.6       | CAGTTTGCAACATGTCTGTACC                 | TAGCAACGTATTGCAGTCTCC                  |
| SLC39A8        | NM_001135147.1    | CTGCAATACCAGCACCTTCA                   | CACACACAGCATCACGTCTC                   |
| SAT1           | NM_213613.4       | GTCTTTGCCTAACGTGCGCTG                  | TTAGGGAGGCGGTGCTTAGA                   |
| FTL            | NM_000146.4       | CAACCAACCATGAGCTCCCA                   | TTTCATGGCGTCTGGGGTTT                   |
| SLC3A2         | NM_002394.6       | GTTTGTCTCAGGCAAGGCTC                   | GGAACAAGGAAAGGAGGGAG                   |
| GCLC           | NM_001498.4       | GAGGTCAAACCCAACCCAGT                   | AAGGTACTGAAGCGAGGGTG                   |
| ACSL3          | NM_004457.5       | TGACACAAGGGCGCATATCT                   | CCAGTCCTTCCCAACAACGA                   |
| LCPAT3         | NM_005768.6       | TGTGGAAAGACAGGCTGCCA                   | GAAGAGGCAGAAGGCAGTCAT                  |
| $\beta$ -actin | NM_001101.3       | CGAGCGCGGCTACAGCTT                     | TCCTTAATGTCACGCACGATT                  |

**Table S2. Antibodies used for western blotting, immunohistochemical staining and ChIP assay.**

| Antibody                | Product number | Maker                       | Experiment                                                                                       | Dilution                                                        |
|-------------------------|----------------|-----------------------------|--------------------------------------------------------------------------------------------------|-----------------------------------------------------------------|
| Anti-YY2                | sc-374455      | Santa Cruz<br>Biotechnology | Western blotting<br>Immunohistochemistry<br>Chromatin Immunoprecipitation<br>Immunoprecipitation | 1/1000<br>1/100<br>30 µg/mL cell lysate<br>25 µg/mL cell lysate |
| Anti-YY1                | 22156-1-AP     | Proteintech                 | Western blotting<br>Immunohistochemistry<br>Chromatin Immunoprecipitation<br>Immunoprecipitation | 1/1000<br>1/200<br>30 µg/mL cell lysate<br>25 µg/mL cell lysate |
| Anti-SLC7A11            | 26864-1-AP     | Proteintech                 | Western blotting<br>Immunohistochemistry                                                         | 1/1500<br>1/500                                                 |
| Anti-p53                | 60283-2- Ig    | Proteintech                 | Western blotting                                                                                 | 1/1000                                                          |
| Anti-β-actin            | 60008-1- Ig    | Proteintech                 | Western blotting                                                                                 | 1/100000                                                        |
| Anti-histone H3         | 17168-1-AP     | Proteintech                 | Chromatin Immunoprecipitation                                                                    | 30 µg/mL cell lysate                                            |
| Anti-4-HNE              | CABT-B1068     | Creative<br>Diagnostics     | Immunohistochemistry                                                                             | 1/500                                                           |
| Goat anti-rabbit<br>IgG | ZB2301         | ZSGB-BIO                    | Western blotting                                                                                 | 1/10000                                                         |
| Goat anti-mouse<br>IgG  | ZB2305         | ZSGB-BIO                    | Western blotting                                                                                 | 1/10000                                                         |
